# Supplementary figures and images for: Immune Prophylaxis Targeting the Respiratory Syncytial Virus (RSV) G Protein
Source: MDPI journal article supplement (doi:10.3390/v15051067), 2023-04-27

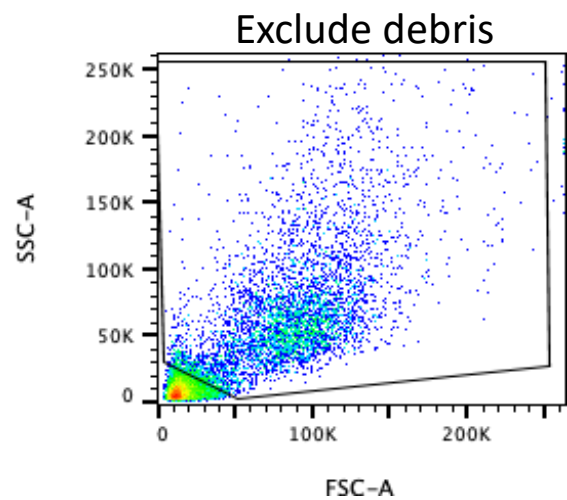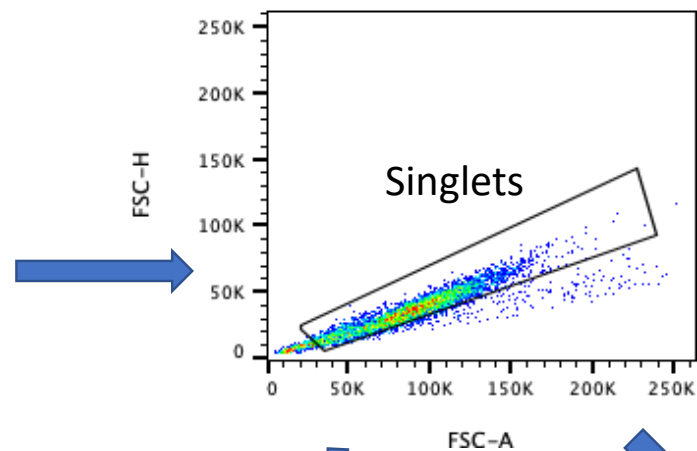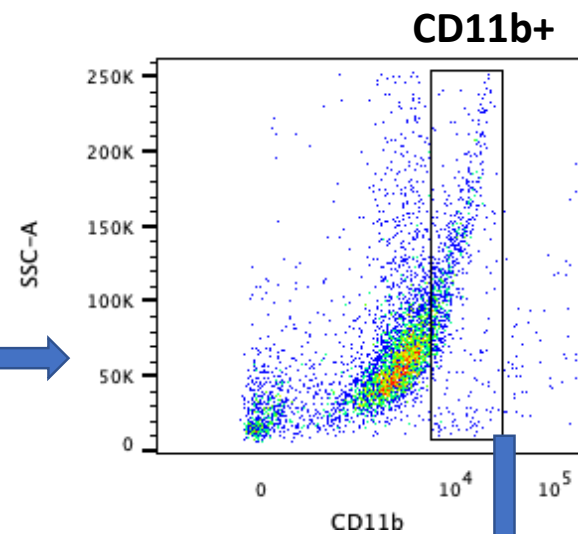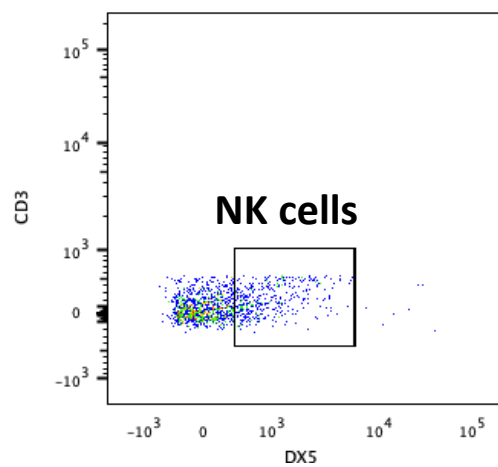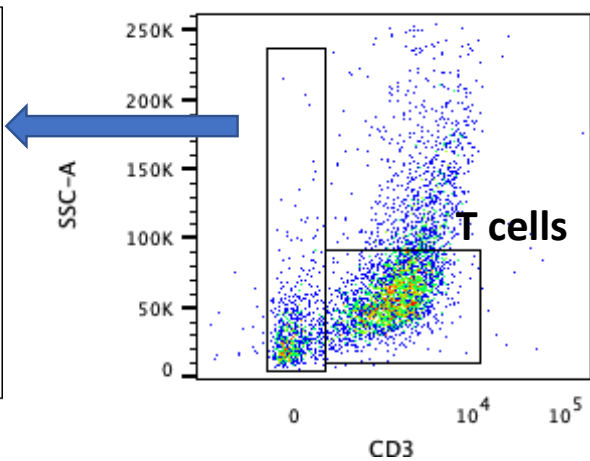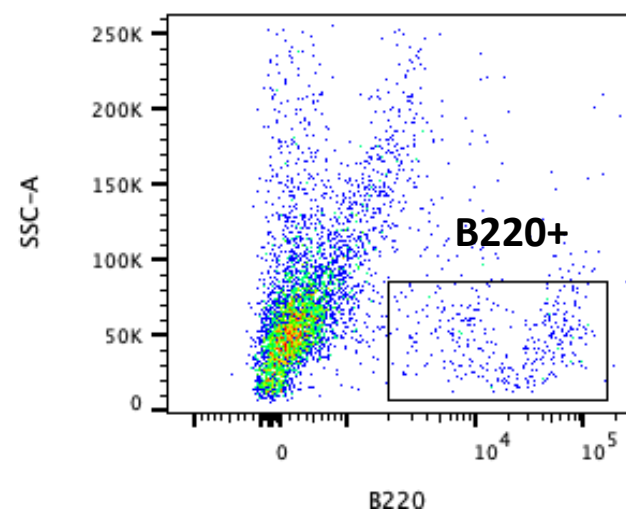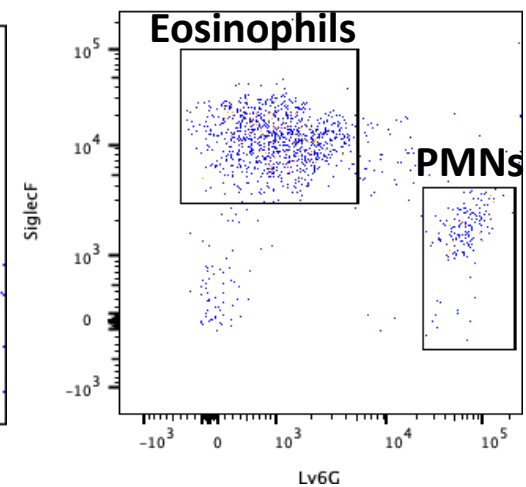

Supplement: s1 [file s1]
